# Supplementary material
Source: PubMed Central journal article supplement (PMC4371959)
Supplement: pnas.201416964SI.pdf [file pnas.201416964SI.pdf]

# Supporting Information

Coffey 10.1073/pnas.1416964112

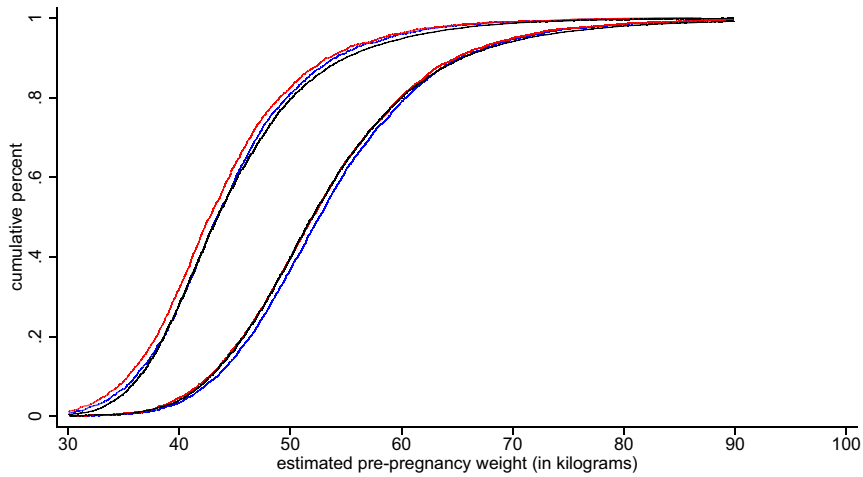

**Fig. S1.** Three estimates of prepregnancy weight for India (left) and sub-Saharan Africa (right). This figure shows six distributions of estimated prepregnancy weight. The three distributions for India are to the left of those for sub-Saharan Africa. The distributions in black are estimated using the extended non-parametric reweighting, which adjusts the body weights of nonpregnant women for selection into pregnancy. This method is described in *Materials and Methods*. Distributions shown in red and blue are estimated from a cross section of women who are 3+ mo pregnant. I first regress body weight on month of gestation, and all of the indicator variables used in the extended nonparametric reweighting, and their interactions with month of gestation. For each woman who has completed the first trimester, I compute the effect of gestational age on her body weight based on her own characteristics, month gestation, and the interactions of these variables. To estimate an individual prepregnancy weight, I subtract from her body weight the product of her gestational age and her estimated effect. The blue distributions assume that no weight is gained in the first trimester, and the red distributions assume that 10% of an individual's estimated second and third trimester gain is gained in the first trimester.

**Table S1. Countries included in the sub-Saharan Africa sample**

| Country                      | Year of DHS survey |
|------------------------------|--------------------|
| Benin                        | 2006               |
| Burkina Faso                 | 2003               |
| Burundi                      | 2010               |
| Cameroon                     | 2004               |
| Chad                         | 2004               |
| Democratic Republic of Congo | 2007               |
| Ethiopia                     | 2005               |
| Gabon                        | 2000               |
| Ghana                        | 2003               |
| Guinea                       | 2005               |
| Kenya                        | 2003               |
| Lesotho                      | 2004               |
| Liberia                      | 2007               |
| Madagascar                   | 2003               |
| Malawi                       | 2004               |
| Mali                         | 2006               |
| Mozambique                   | 2003               |
| Namibia                      | 2006               |
| Niger                        | 2006               |
| Nigeria                      | 2003               |
| Rwanda                       | 2005               |
| São Tomé and Príncipe        | 2008               |
| Senegal                      | 2005               |
| Sierra Leone                 | 2008               |
| Swaziland                    | 2006               |
| Tanzania                     | 2004               |
| Uganda                       | 2006               |
| Zambia                       | 2007               |
| Zimbabwe                     | 2005               |



**Table S3. Linear probability regressions predicting pregnancy, using covariates from the extended reweighting**

|                             | India                | Sub-Saharan Africa   |
|-----------------------------|----------------------|----------------------|
| Age group (y)               |                      |                      |
| 15–19                       | .                    | .                    |
| 20–24                       | 0.053***<br>(0.003)  | 0.042***<br>(0.003)  |
| 25–29                       | 0.033***<br>(0.004)  | 0.040***<br>(0.003)  |
| 30–39                       | –0.044***<br>(0.003) | –0.001<br>(0.003)    |
| 40–49                       | –0.090***<br>(0.004) | –0.080***<br>(0.003) |
| Education level             |                      |                      |
| Primary or less             | 0.027***<br>(0.002)  | 0.024***<br>(0.002)  |
| Residence                   |                      |                      |
| Urban                       | –0.004*<br>(0.002)   | –0.014***<br>(0.002) |
| Age of youngest child       |                      |                      |
| No living children          | .                    | .                    |
| Less than 12 mo             | 0.020***<br>(0.005)  | –0.047***<br>(0.003) |
| Between 12 and 23 mo        | 0.154***<br>(0.006)  | 0.223***<br>(0.005)  |
| 24 mo or more               | 0.093***<br>(0.005)  | 0.012***<br>(0.004)  |
| Sex of children             |                      |                      |
| Has a living son            | –0.026***<br>(0.004) | 0.001<br>(0.003)     |
| Number of living children   |                      |                      |
| None                        | .                    | .                    |
| One                         | .                    | .                    |
| Two                         | –0.024***<br>(0.004) | 0.012***<br>(0.003)  |
| Three                       | –0.024***<br>(0.005) | 0.006<br>(0.003)     |
| Four or more                | –0.024***<br>(0.004) | 0.010**<br>(0.003)   |
| Child death                 |                      |                      |
| Any child death in last 5 y | 0.065***<br>(0.007)  | 0.046***<br>(0.003)  |
| Constant                    | 0.033***<br>(0.002)  | 0.059***<br>(0.002)  |
| <i>n</i>                    | 74,598               | 166,565              |

SEs are shown in parentheses. Two-sided *P* values: \**P* < 0.05; \*\*\**P* < 0.01; \*\*\*\**P* < 0.001. Women whose heights and weights were measured and who are 3+ months pregnant, or not pregnant and not contracepting, are included in the regression.

**Table S4. Distribution of gestational ages in the Indian and sub-Saharan African samples**

| Month of gestation | India           |                            | Sub-Saharan Africa |                            |
|--------------------|-----------------|----------------------------|--------------------|----------------------------|
|                    | Number of women | Fraction of pregnant women | Number of women    | Fraction of pregnant women |
| 1                  | 107             | 0.019                      | 509                | 0.026                      |
| 2                  | 495             | 0.088                      | 1,488              | 0.076                      |
| 3                  | 759             | 0.134                      | 2,197              | 0.112                      |
| 4                  | 729             | 0.129                      | 2,534              | 0.129                      |
| 5                  | 727             | 0.128                      | 2,736              | 0.139                      |
| 6                  | 693             | 0.123                      | 2,591              | 0.132                      |
| 7                  | 668             | 0.118                      | 2,627              | 0.134                      |
| 8                  | 695             | 0.123                      | 2,720              | 0.138                      |
| 9+                 | 785             | 0.139                      | 2,250              | 0.115                      |

Design weights, described in *Materials and Methods*, are used.

**Table S5. Method 1 estimates of weight gain during pregnancy, which use early pregnancy as a counterfactual**

|                                      | 1            | 2            | 3            | 4            | 5            |
|--------------------------------------|--------------|--------------|--------------|--------------|--------------|
| Estimates for India                  |              |              |              |              |              |
| Coefficient & SE for month gestation | 1.08 (0.05)  | 1.06 (0.05)  | 1.06 (0.05)  | 0.99 (0.06)  | 1.08 (0.06)  |
| Estimated gain (kg)                  | 7.13         | 7.00         | 7.00         | 6.53         | 7.13         |
| 95% CI                               | (6.48, 7.77) | (6.35, 7.64) | (6.35, 7.64) | (5.76, 7.31) | (6.35, 7.90) |
| <i>n</i>                             | 5,055        | 5,055        | 5,055        | 4,316        | 4,279        |
| Estimates for sub-Saharan Africa     |              |              |              |              |              |
| Coefficient & SE for month gestation | 0.98 (0.04)  | 0.94 (0.03)  | 0.95 (0.03)  | 1.00 (0.04)  | 0.92 (0.04)  |
| Estimated gain (kg)                  | 6.47         | 6.20         | 6.27         | 6.60         | 6.07         |
| 95% CI                               | (5.95, 6.99) | (5.82, 6.59) | (5.88, 6.66) | (6.08, 7.12) | (5.55, 6.59) |
| <i>n</i> *                           | 17,601       | 17,333       | 17,333       | 15,149       | 15,244       |
| Age fixed effects                    |              | ✓            | ✓            | ✓            | ✓            |
| Years of schooling fixed effects     |              | ✓            | ✓            | ✓            | ✓            |
| Number of children fixed effects     |              | ✓            | ✓            | ✓            | ✓            |
| Urban                                |              | ✓            | ✓            | ✓            | ✓            |
| Wealth quintile × country            |              | ✓            | ✓            | ✓            | ✓            |
| Place × month fixed effects          |              |              | ✓            | ✓            | ✓            |
| Gestational months                   | 3–9          | 3–9          | 3–9          | 4–9          | 3–8          |

All coefficients are significant at the 0.001 level.

\*Wealth quintiles are not provided for Gabon; these data are dropped from regressions in columns 2–5.
